# Supplementary material for: ZnO/Graphene Oxide on Halloysite Nanotubes as a Superabsorbent Nanocomposite Photocatalyst for the Degradation of Organic Dyes
Source: MDPI journal article supplement (doi:10.3390/nano13131895), 2023-06-21
Supplement: s1 [file s1]

# Supplementary Materials

## ZnO/Graphene Oxide on Halloysite Nanotubes as a Superabsorbent Nanocomposite Photocatalyst for the Degradation of Organic Dyes

Jongik Park <sup>1</sup>, Hyungwook Lee <sup>2</sup>, Keonku Lee <sup>2</sup>, Sieun Noh <sup>2</sup>, Soyeong Jin <sup>2,3</sup>, Jungho Jae <sup>4</sup>,  
Youngdo Jeong <sup>3,5,\*</sup> and Jaegeun Noh <sup>1,2,6,\*</sup>

<sup>1</sup> Department of Convergence of Nanoscience, Hanyang University, 222 Wangsimni-ro, Seongdong-gu, Seoul 04763, Republic of Korea; siy171@naver.com

<sup>2</sup> Department of Chemistry, Hanyang University, 222 Wangsimni-ro, Seongdong-gu, Seoul 04763, Republic of Korea; winning\_07@naver.com (H.L.); leekku10@gmail.com (K.L.); sieun.noh@kakao.com (S.N.); truejin@hanyang.ac.kr (S.J.)

<sup>3</sup> Center for Biomaterials, Biomedical Research Institute, Korea Institute of Science and Technology (KIST), Seoul 02792, Republic of Korea

<sup>4</sup> School of Chemical and Biomolecular Engineering, Pusan National University, Busan 46241, Republic of Korea; jh.jae@pusan.ac.kr

<sup>5</sup> Department of HY-KIST Bio-Convergence, Hanyang University, 222 Wangsimni-ro, Seongdong-gu, Seoul 04763, Republic of Korea

<sup>6</sup> Research Institute for Convergence of Basic Science, Hanyang University, 222 Wangsimni-ro, Seongdong-gu, Seoul 04763, Republic of Korea

\* Correspondence: zerodegree@kist.re.kr (Y.J.); jgnoh@hanyang.ac.kr (J.N.)

## Instruments

TEM samples were prepared by placing one drop of the desired catalysts solution ( $\sim 1\text{--}3\ \mu\text{M}$ ) onto a 300-mesh copper grid coated with carbon film, followed by drying. The samples were analyzed and photographed using a JEM 2100F (JEOL) transmission electron microscope at an accelerating voltage of 80 kV.

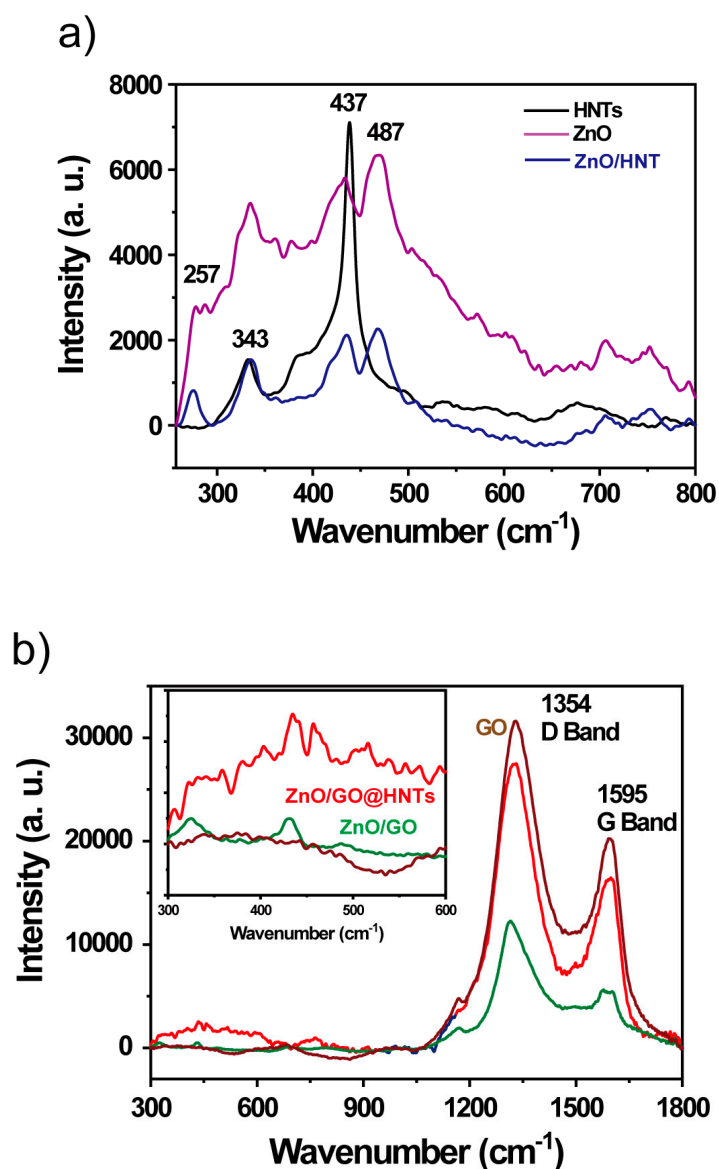

**Figure S1.** Raman spectrum of the nanocomposites of (a) HNT, ZnO, and ZnO/HNT, and (b) ZnO/GO and ZnO/GO/HNTs.

**Table S1.** Summary of the photocatalytic rhodamine B degradation of the various reported materials at direct sunlight.

| Entry | Materials                                                                         | Concentration                                 | Dosing | Time    | Degradation %                                                                                                                                                                                                                                                                                                  | Ref.      |
|-------|-----------------------------------------------------------------------------------|-----------------------------------------------|--------|---------|----------------------------------------------------------------------------------------------------------------------------------------------------------------------------------------------------------------------------------------------------------------------------------------------------------------|-----------|
| 1     | Mn, Fe, Cu, Ce, Ag, Zr doped TiO <sub>2</sub>                                     | 10 mg/L<br>80 mL                              | 20 mg  | 60 min  | Mn/TiO <sub>2</sub> 94.3%<br>Fe/TiO <sub>2</sub> 90.9%<br>Cu/TiO <sub>2</sub> 82.5%<br>Ce/TiO <sub>2</sub> 77.1%<br>Ag/TiO <sub>2</sub> 74.9%<br>Zr/TiO <sub>2</sub> 69.7%<br>Pd/CCA/TiO <sub>2</sub> 97.5%<br>Ag/CCA/TiO <sub>2</sub> 95.5%<br>Co/CCA/TiO <sub>2</sub> 81.8%<br>Ni/CCA/TiO <sub>2</sub> 78.8% | [51]      |
| 2     | Ag, Co, Ni, Pd doped CCA/TiO <sub>2</sub>                                         | 10 mg/L<br>100 mL                             | 100 mg | 180 min |                                                                                                                                                                                                                                                                                                                | [52]      |
| 3     | TiO <sub>2</sub> /g-C <sub>3</sub> N <sub>4</sub>                                 | 10 mg/L<br>30 mL                              | 20 mg  | 40 min  | 91.26%                                                                                                                                                                                                                                                                                                         | [53]      |
| 4     | TiO <sub>2</sub> /α-Fe <sub>2</sub> O <sub>3</sub>                                | 1.0 × 10 <sup>-5</sup> M<br>(5 mg/L)<br>5 mL  | 10 mg  | 60 min  | 98.0%                                                                                                                                                                                                                                                                                                          | [54]      |
| 5     | LaFeO <sub>3</sub> /Ag <sub>2</sub> CO <sub>3</sub>                               | 1.0 × 10 <sup>-5</sup> M<br>(5 mg/L)<br>80 mL | 80 mg  | 45 min  | 99.5%                                                                                                                                                                                                                                                                                                          | [55]      |
| 6     | g-C <sub>3</sub> N <sub>4</sub> /TiO <sub>2</sub> /Bi <sub>2</sub> O <sub>3</sub> | 20 mg/L<br>50 mL                              | 50 mg  | 120min  | colorless                                                                                                                                                                                                                                                                                                      | [56]      |
| 7     | TiO <sub>2</sub> /Polyfluorene                                                    | 6.0 × 10 <sup>-5</sup> M<br>75 mL             | 10 mg  | 60 min  | colorless                                                                                                                                                                                                                                                                                                      | [57]      |
| 8     | HNTs/TiO <sub>2</sub> /La                                                         | 5 mg/L<br>20 mL                               | 20 mg  | 120 min | 96.6%                                                                                                                                                                                                                                                                                                          | [47]      |
| 9     | ZnO/GO@HNT                                                                        | 7 ppm                                         | 3 mg   | 60 min  | 95%                                                                                                                                                                                                                                                                                                            | This work |

- [51] Feng, H., Zhang, M., Yu, L. E., 2012. Hydrothermal synthesis and photocatalytic performance of metal-ions doped TiO<sub>2</sub>. *Appl. Catal. A Gen.* 413–414, 238–244.
- [52] Mahlambi, M. M., Mishra, A. K., Mishra, S. B., Krause, R. W., Mamba, B. B., Raichur, A. M., 2013. Effect of metal ions (Ag, Co, Ni, and Pd) on the visible light degradation of rhodamine B by carbon-covered alumina supported TiO<sub>2</sub> in aqueous solutions. *Ind. Eng. Chem. Res.* 52, 1783–1794.
- [53] Adhikari, S. P., Awasthi, G. P., Kim, H. J., Park, C. H., Kim, C. S., 2016. Electrospinning directly synthesized porous TiO<sub>2</sub> nanofibers modified by graphitic carbon nitride sheets for enhanced photocatalytic degradation activity under solar light irradiation. *Langmuir* 32, 6163–6175.
- [54] Mahajan. J., Jeevanandam, P., 2018. Synthesis of TiO<sub>2</sub>@a-Fe<sub>2</sub>O<sub>3</sub> core-shell heteronanostructures by thermal decomposition approach and their application towards sunlight driven photodegradation of rhodamine B, *New J. Chem.* 42, 2616.
- [55] Pirzada, B. M., Pushpendra, Kunchala, R. K., Naidu, B. S., 2019. Synthesis of LaFeO<sub>3</sub>/Ag<sub>2</sub>CO<sub>3</sub> nanocomposites for photocatalytic degradation of rhodamine B and p-Chlorophenol under natural sunlight. *ACS Omega* 4, 2618–2629.
- [56] Peng, W., Yang, C., Yu, J., 2020. Bi<sub>2</sub>O<sub>3</sub> and g-C<sub>3</sub>N<sub>4</sub> quantum dot modified anatase TiO<sub>2</sub> heterojunction system for degradation of dyes under sunlight irradiation. *RSC Adv.* 10, 1181–1190.
- [57] Bai, W., Tian, X., Yao, R., Chen, Y., Lin, H., Zheng, J., Xu, Y., Lin, J., 2020. Preparation of nano-TiO<sub>2</sub>@polyfluorene composite particles for the photocatalytic degradation of organic pollutants under sunlight. *Sol. Energy* 196, 616–624.
